# Supplementary material for: The 2-hydroxy-3-(4-aryl-1-piperazinyl)propyl Phthalimide Derivatives as Prodrugs—Spectroscopic and Theoretical Binding Studies with Plasma Proteins
Source: Int J Mol Sci. 2022 Jun 23;23(13):7003. doi: 10.3390/ijms23137003 (PMC9266550; doi:10.3390/ijms23137003)
Supplement: Supplementary file 1 [file ijms-23-07003-s001.zip › ijms-1779308-supplementary.pdf]

## Supplementary Materials

# The 2-hydroxy-3-(4-aryl-1-piperazinyl)propyl Phthalimide Derivatives as Prodrugs – Spectroscopic and Theoretical Binding Studies with Plasma Proteins

Aleksandra Marciniak <sup>1,\*</sup>, Aleksandra Kotynia <sup>1</sup>, Dominika Szkatuła <sup>2</sup>, Edward Krzyżak <sup>1</sup>

<sup>1</sup> Department of Inorganic Chemistry, Wrocław Medical University, ul. Borowska 211a, 50-556 Wrocław, Poland; aleksandra.kotynia@umw.edu.pl (A.K.); edward.krzyzak@umw.edu.pl (E.K.)

<sup>2</sup> Department of Medicinal Chemistry, Wrocław Medical University, ul. Borowska 211, 50-556 Wrocław, Poland; dominika.szkatula@umw.edu.pl

\* Correspondence: aleksandra.marciniak@umw.edu.pl; Tel.: +48-71-784-03-35

### Supplementary materials

List of Supplementary Files:

1. Supplementary Figures S1-S2
2. Supplementary Tables S1-S5

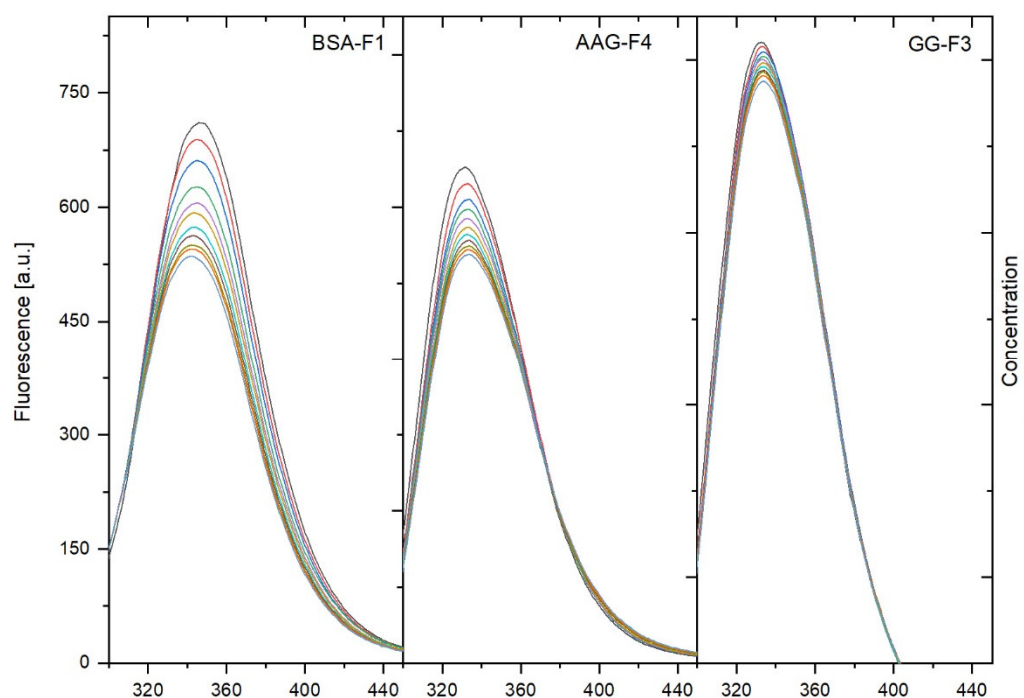

**Figure S1.** Fluorescence spectra of BSA-F1, AAG-F4, and GG-F3 systems in the presence of different concentration of compounds F1, F4, and F3.

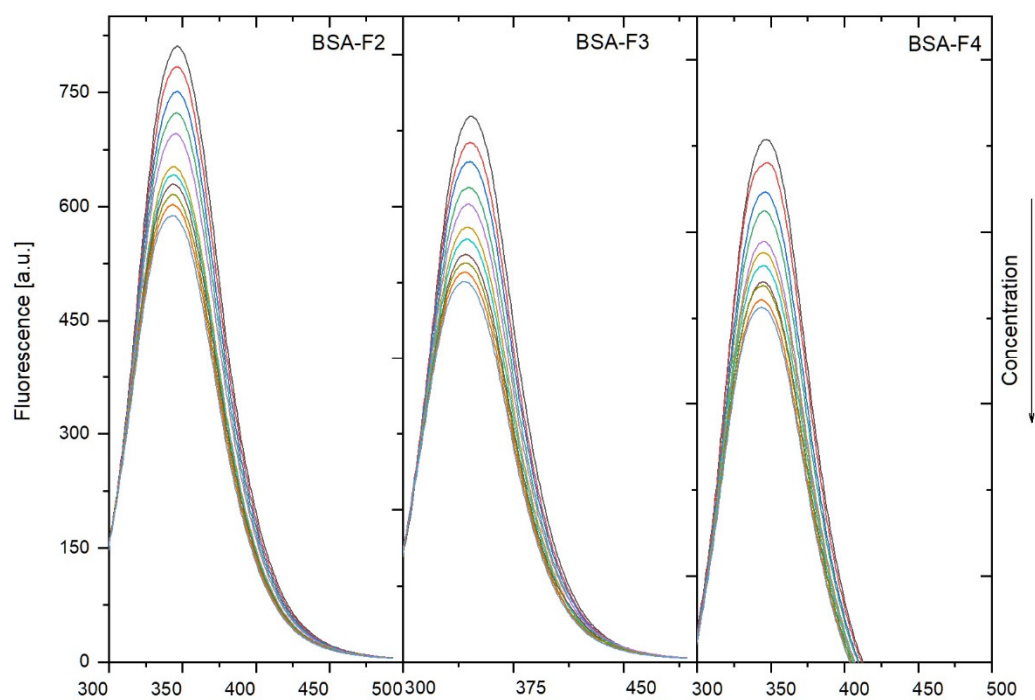

**Figure S2.** Fluorescence spectra of BSA-F2, BSA-F2, and BSA-F3 systems in the presence of different concentration of compounds F2-F4.

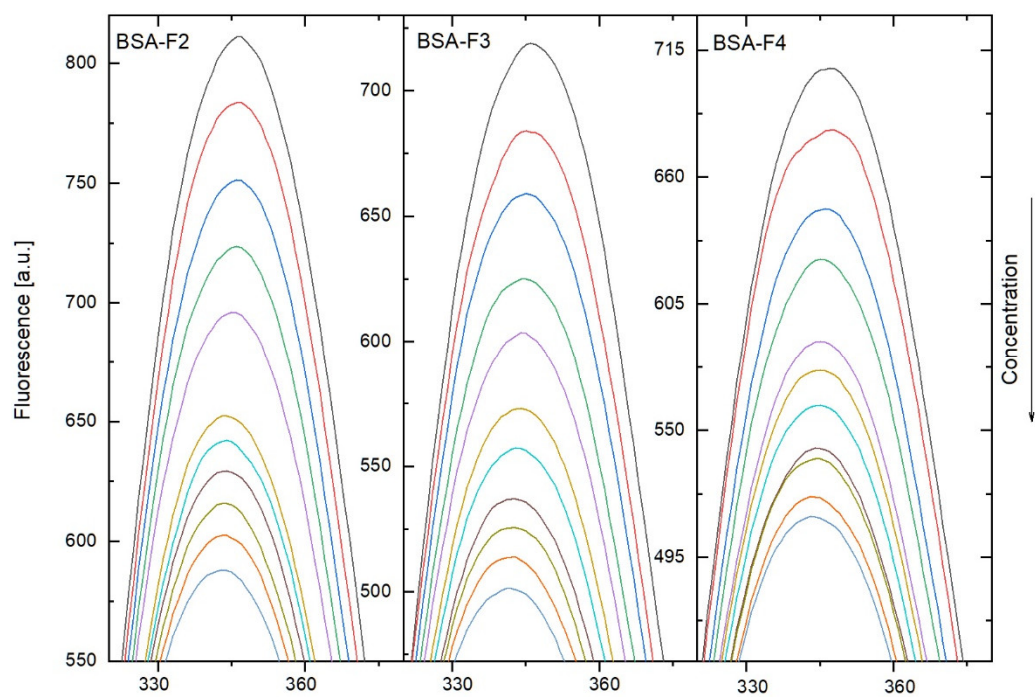

**Figure S3.** Fluorescence spectra (zoom on maximum) of BSA-F2, BSA-F2, and BSA-F3 systems in the presence of different concentration of compounds F2-F4.

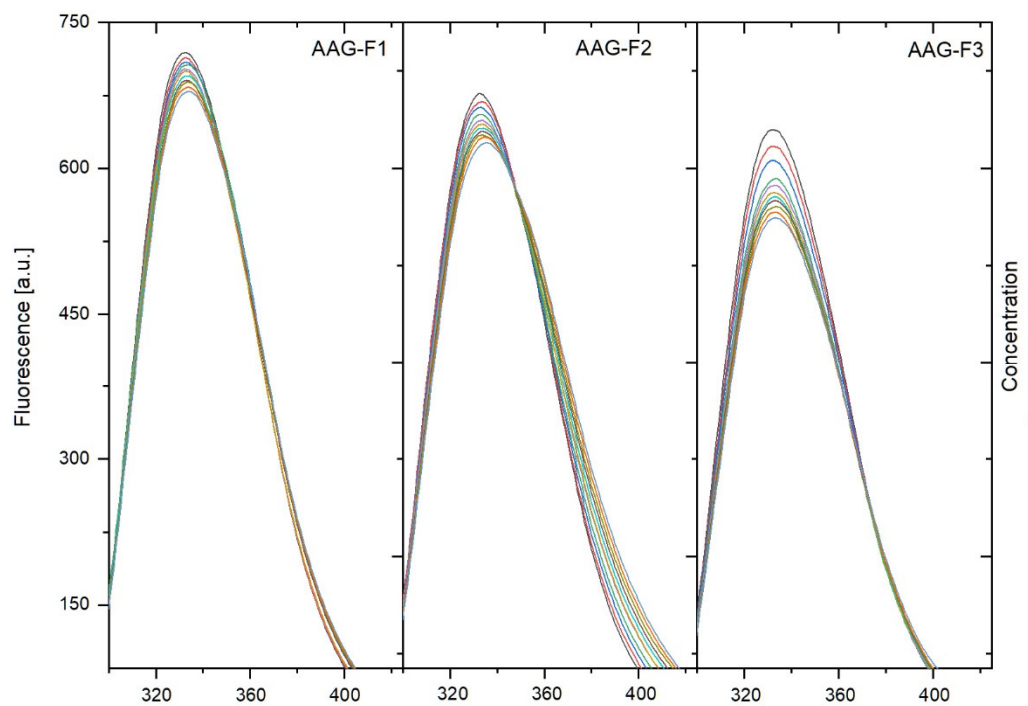

**Figure S4.** Fluorescence spectra of AAG-F1, AAG-F2, and AAG-F3 systems in the presence of different concentration of compounds F1-F3.

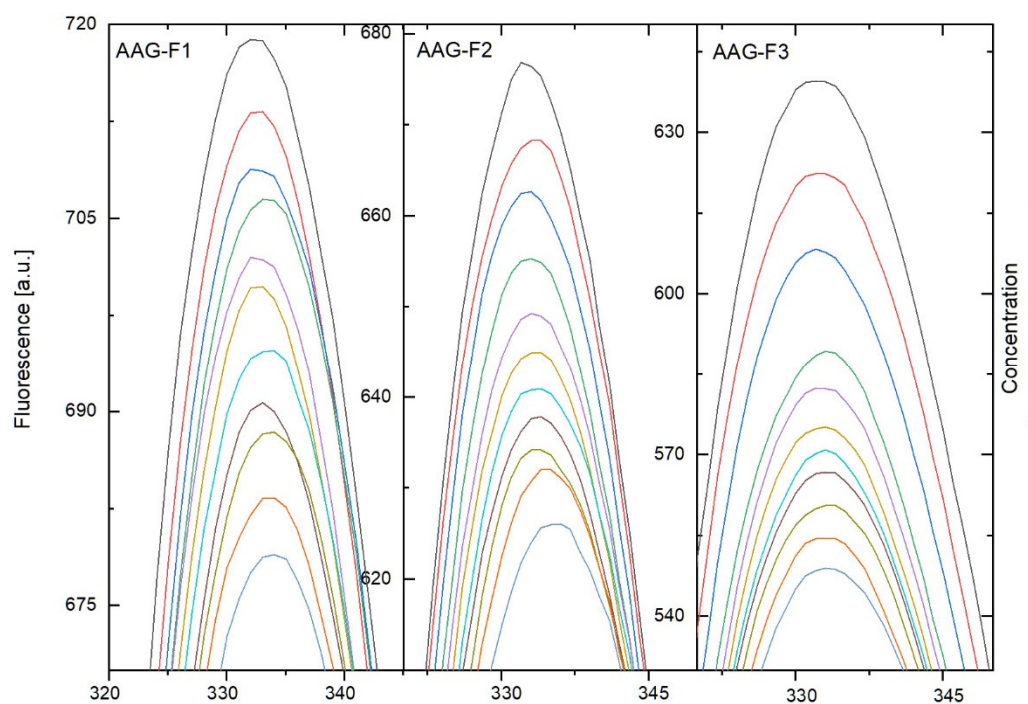

**Figure S5.** Fluorescence spectra (zoom on maximum) of AAG-F1, AAG-F2, and AAG-F3 systems in the presence of different concentration of compounds F1-F3.

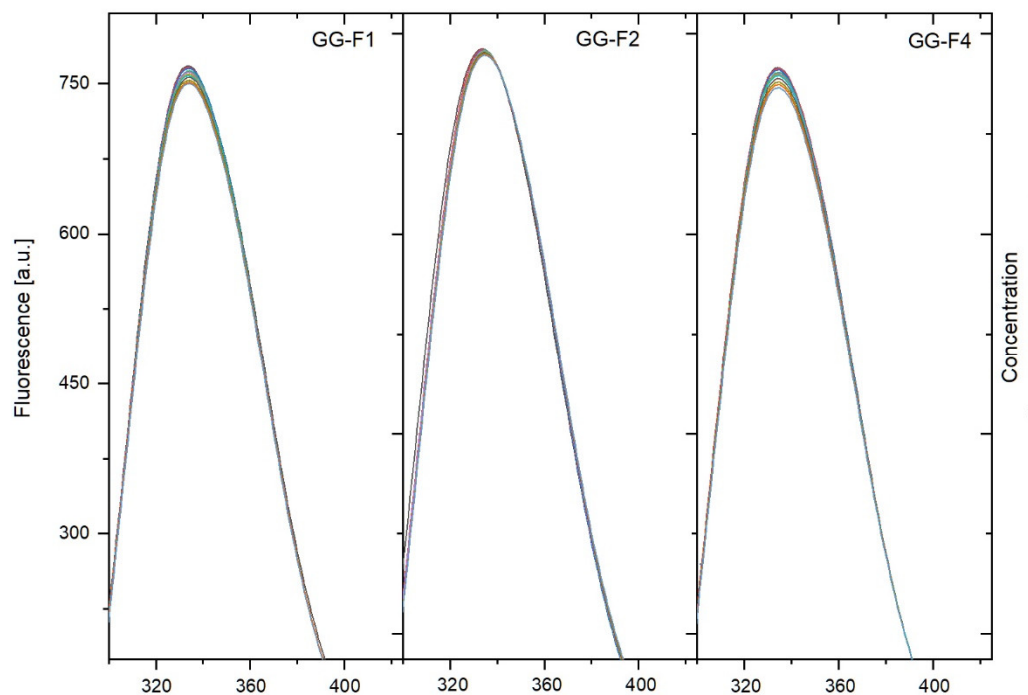

**Figure S6.** Fluorescence spectra of GG-F1, GG-F2, and GG-F4 systems in the presence of different concentration of compounds F1, F2, F4.

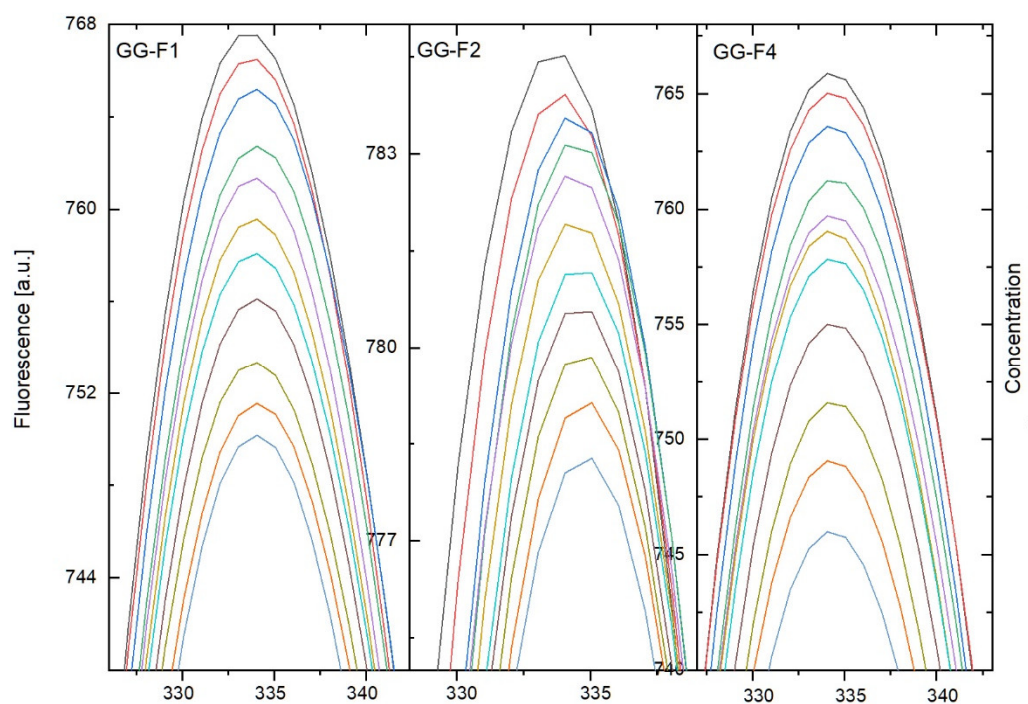

**Figure S7.** Fluorescence spectra( zoom on maximum) of GG-F1, GG-F2, and GG-F4 systems in the presence of different concentration of compounds F1, F2, F4.

**Table S1.** The percentage of content of secondary structure elements in BSA in the absence and presence of compounds F1, F2, F3, and F4.

| <b>BSA : analyzed</b> |                                    |                                   |                                  |                |
|-----------------------|------------------------------------|-----------------------------------|----------------------------------|----------------|
| <b>compound</b>       | <b>% <math>\alpha</math>-helix</b> | <b>% <math>\beta</math>-sheet</b> | <b>% <math>\beta</math>-turn</b> | <b>% other</b> |
| <b>molar ratio</b>    |                                    |                                   |                                  |                |
| <b>Compound F1</b>    |                                    |                                   |                                  |                |
| 1:0                   | 58.6%                              | 6.1%                              | 10.0%                            | 25.3%          |
| 1:0.5                 | 58.0%                              | 6.8%                              | 10.0%                            | 25.2%          |
| 1:1                   | 57.7%                              | 6.9%                              | 10.0%                            | 25.3%          |
| 1:2                   | 57.6%                              | 7.4%                              | 10.0%                            | 25.0%          |
| 1:5                   | 57.2%                              | 7.6%                              | 10.0%                            | 25.2%          |
| 1:10                  | 56.7%                              | 8.0%                              | 10.1%                            | 25.3%          |
| <b>Compound F2</b>    |                                    |                                   |                                  |                |
| 1:0                   | 60.4%                              | 5.2%                              | 9.9%                             | 24.5%          |
| 1:0.5                 | 59.8%                              | 5.4%                              | 10.0%                            | 24.9%          |
| 1:1                   | 59.3%                              | 5.7%                              | 10.0%                            | 25.0%          |
| 1:2                   | 59.0%                              | 5.9%                              | 10.0%                            | 25.0%          |
| 1:5                   | 58.5%                              | 6.2%                              | 10.1%                            | 25.2%          |
| 1:10                  | 57.9%                              | 7.0%                              | 10.0%                            | 25.1%          |
| <b>Compound F3</b>    |                                    |                                   |                                  |                |
| 1:0                   | 60.5%                              | 5.2%                              | 9.9%                             | 24.4%          |
| 1:0.5                 | 59.8%                              | 5.9%                              | 9.9%                             | 24.4%          |
| 1:1                   | 59.3%                              | 6.4%                              | 9.9%                             | 24.4%          |
| 1:2                   | 59.1%                              | 6.6%                              | 9.9%                             | 24.4%          |
| 1:5                   | 58.6%                              | 6.9%                              | 9.9%                             | 24.6%          |
| 1:10                  | 57.9%                              | 7.1%                              | 10.0%                            | 25.0%          |
| <b>Compound F4</b>    |                                    |                                   |                                  |                |
| 1:0                   | 60.1%                              | 5.5%                              | 9.9%                             | 24.5%          |
| 1:0.5                 | 59.5%                              | 6.5%                              | 9.8%                             | 24.2%          |
| 1:1                   | 58.9%                              | 6.9%                              | 9.9%                             | 24.3%          |
| 1:2                   | 58.5%                              | 7.2%                              | 9.9%                             | 24.4%          |
| 1:5                   | 58.2%                              | 7.6%                              | 9.9%                             | 24.3%          |
| 1:10                  | 57.7%                              | 8.0%                              | 9.9%                             | 24.4%          |

**Table S2.** The percentage of content of secondary structure elements in AAG in the absence and presence of compounds F1, F2, F3, and F4.

| <b>AAG : analyzed</b> |                                    |                                   |                                  |                |
|-----------------------|------------------------------------|-----------------------------------|----------------------------------|----------------|
| <b>compound</b>       | <b>% <math>\alpha</math>-helix</b> | <b>% <math>\beta</math>-sheet</b> | <b>% <math>\beta</math>-turn</b> | <b>% other</b> |
| <b>molar ratio</b>    |                                    |                                   |                                  |                |
| <b>Compound F1</b>    |                                    |                                   |                                  |                |
| 1:0                   | 35.1%                              | 29.2%                             | 9.5%                             | 26.3%          |
| 1:0.5                 | 34.6%                              | 29.3%                             | 9.5%                             | 26.6%          |
| 1:1                   | 34.3%                              | 29.2%                             | 9.5%                             | 27.0%          |
| 1:2                   | 34.1%                              | 29.5%                             | 9.5%                             | 26.9%          |
| 1:5                   | 33.8%                              | 29.4%                             | 9.6%                             | 27.2%          |
| 1:10                  | 33.4%                              | 29.7%                             | 9.6%                             | 27.3%          |
| <b>Compound F2</b>    |                                    |                                   |                                  |                |
| 1:0                   | 33.7%                              | 29.6%                             | 9.6%                             | 27.1%          |
| 1:0.5                 | 33.3%                              | 29.8%                             | 9.6%                             | 27.3%          |
| 1:1                   | 33.2%                              | 29.8%                             | 9.6%                             | 27.5%          |
| 1:2                   | 33.1%                              | 30.1%                             | 9.6%                             | 27.2%          |
| 1:5                   | 32.9%                              | 30.3%                             | 9.6%                             | 27.2%          |
| 1:10                  | 32.4%                              | 30.4%                             | 9.7%                             | 27.6%          |
| <b>Compound F3</b>    |                                    |                                   |                                  |                |
| 1:0                   | 33.7%                              | 29.8%                             | 9.5%                             | 27.0%          |
| 1:0.5                 | 33.1%                              | 29.8%                             | 9.6%                             | 27.5%          |
| 1:1                   | 33.3%                              | 29.9%                             | 9.6%                             | 27.2%          |
| 1:2                   | 33.1%                              | 29.6%                             | 9.7%                             | 27.7%          |
| 1:5                   | 32.6%                              | 30.3%                             | 9.7%                             | 27.5%          |
| 1:10                  | 33.7%                              | 29.8%                             | 9.5%                             | 27.0%          |
| <b>Compound F4</b>    |                                    |                                   |                                  |                |
| 1:0                   | 33.5%                              | 29.5%                             | 9.6%                             | 27.5%          |
| 1:0.5                 | 33.3%                              | 29.5%                             | 9.6%                             | 27.5%          |
| 1:1                   | 33.0%                              | 29.5%                             | 9.6%                             | 27.8%          |
| 1:2                   | 32.9%                              | 30.1%                             | 9.6%                             | 27.4%          |
| 1:5                   | 32.5%                              | 29.9%                             | 9.7%                             | 27.9%          |
| 1:10                  | 31.8%                              | 30.5%                             | 9.7%                             | 28.0%          |

**Table S3.** The percentage of content of secondary structure elements in GG in the absence and presence of compounds F1, F2, F3, and F4.

| <b>GG: analyzed</b> |                                    |                                   |                                  |                |
|---------------------|------------------------------------|-----------------------------------|----------------------------------|----------------|
| <b>compound</b>     | <b>% <math>\alpha</math>-helix</b> | <b>% <math>\beta</math>-sheet</b> | <b>% <math>\beta</math>-turn</b> | <b>% other</b> |
| <b>molar ratio</b>  |                                    |                                   |                                  |                |
| <b>Compound F1</b>  |                                    |                                   |                                  |                |
| 1:0                 | 10.0%                              | 37.8%                             | 13.3%                            | 38.8%          |
| 1:0.5               | 9.9%                               | 38.0%                             | 13.3%                            | 38.8%          |
| 1:1                 | 9.8%                               | 37.8%                             | 13.3%                            | 39.1%          |
| 1:2                 | 9.9%                               | 38.0%                             | 13.3%                            | 38.8%          |
| 1:5                 | 9.7%                               | 38.2%                             | 13.3%                            | 38.8%          |
| 1:10                | 9.4%                               | 38.8%                             | 13.2%                            | 38.5%          |
| <b>Compound F2</b>  |                                    |                                   |                                  |                |
| 1:0                 | 9.7%                               | 38.3%                             | 13.3%                            | 38.7%          |
| 1:0.5               | 9.4%                               | 38.0%                             | 13.3%                            | 39.2%          |
| 1:1                 | 9.5%                               | 38.3%                             | 13.3%                            | 38.9%          |
| 1:2                 | 9.4%                               | 38.1%                             | 13.3%                            | 39.1%          |
| 1:5                 | 9.4%                               | 38.1%                             | 13.3%                            | 39.1%          |
| 1:10                | 9.2%                               | 39.3%                             | 13.2%                            | 38.2%          |
| <b>Compound F3</b>  |                                    |                                   |                                  |                |
| 1:0                 | 9.6%                               | 37.9%                             | 13.3%                            | 39.1%          |
| 1:0.5               | 9.6%                               | 37.9%                             | 13.3%                            | 39.1%          |
| 1:1                 | 9.5%                               | 38.3%                             | 13.3%                            | 38.9%          |
| 1:2                 | 9.4%                               | 37.9%                             | 13.3%                            | 39.3%          |
| 1:5                 | 9.5%                               | 38.6%                             | 13.2%                            | 38.6%          |
| 1:10                | 9.2%                               | 38.3%                             | 13.3%                            | 39.2%          |
| <b>Compound F4</b>  |                                    |                                   |                                  |                |
| 1:0                 | 9.7%                               | 38.1%                             | 13.3%                            | 39.0%          |
| 1:0.5               | 9.5%                               | 38.1%                             | 13.3%                            | 39.0%          |
| 1:1                 | 9.5%                               | 37.9%                             | 13.3%                            | 39.2%          |
| 1:2                 | 9.6%                               | 38.0%                             | 13.3%                            | 39.1%          |
| 1:5                 | 9.5%                               | 38.4%                             | 13.3%                            | 38.8%          |
| 1:10                | 9.4%                               | 39.0%                             | 13.2%                            | 38.3%          |

**Table S4.** The percentage of the secondary structure of blood serum proteins BSA, AAG, GG, and complexes with compound F1-F4 at pH=7.5 with equimolar ratio, calculated from deconvolution Amide I band obtain by ATR-IR spectra.

| <b>compound</b> | <b>% <math>\alpha</math>-helix</b> | <b>% <math>\beta</math>-sheet</b> | <b>% <math>\beta</math>-turn</b> | <b>% <math>\beta</math>-anti</b> | <b>%<br/>random</b> |
|-----------------|------------------------------------|-----------------------------------|----------------------------------|----------------------------------|---------------------|
| <b>BSA</b>      |                                    |                                   |                                  |                                  |                     |
| free protein    | 57.92%                             | 12.67%                            | 9.27%                            | 9.01%                            | 11.13%              |
| F1              | 48.1%                              | 16.71%                            | 9.41%                            | 9.46%                            | 16.32%              |
| F2              | 45.72%                             | 17.18%                            | 9.28%                            | 11.53%                           | 16.29%              |
| F3              | 49.52%                             | 14.51%                            | 9.25%                            | 10.47%                           | 16.25%              |
| F4              | 47.29%                             | 15.82%                            | 9.06%                            | 11.78%                           | 16.05%              |
| <b>AAG</b>      |                                    |                                   |                                  |                                  |                     |
| free protein    | 34.75%                             | 26.24%                            | 8.60%                            | 3.33%                            | 27.08%              |
| F1              | 28.67%                             | 31.71%                            | 10.45%                           | 4.34%                            | 24.83%              |
| F2              | 28.26%                             | 28.55%                            | 10.66%                           | 6.82%                            | 25.71%              |
| F3              | 32.11%                             | 28.51%                            | 7.68%                            | 5.55%                            | 26.51%              |
| F4              | 28.73%                             | 31.12%                            | 8.13%                            | 6.28%                            | 25.74%              |
| <b>GG</b>       |                                    |                                   |                                  |                                  |                     |
| free protein    | 11.56%                             | 22.45%                            | 20.84%                           | 5.70%                            | 39.45%              |
| F1              | 11.39%                             | 27.21%                            | 19.79%                           | 2.56%                            | 39.06%              |
| F2              | 10.61%                             | 21.78%                            | 20.47%                           | 2.89%                            | 38.26%              |
| F3              | 10.85%                             | 23.99%                            | 24.33%                           | 2.70%                            | 38.10%              |
| F4              | 10.93%                             | 26.29%                            | 21.81%                           | 3.26%                            | 37.71%              |
